# Supplementary material
Source: PubMed Central journal article supplement (PMC10987274)

A

## Site\_Class

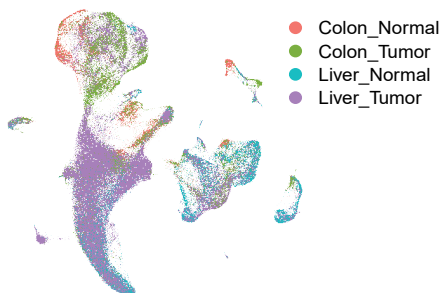

B

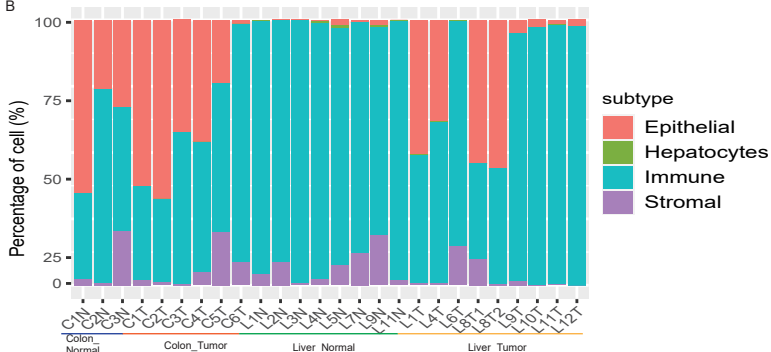

C

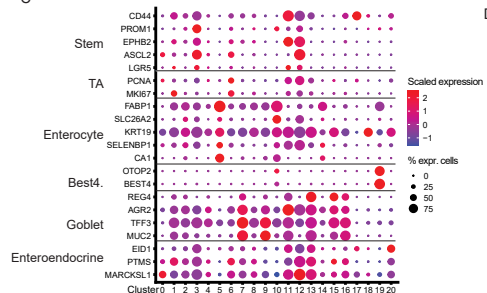

D

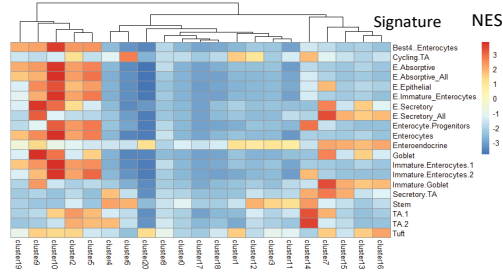

E

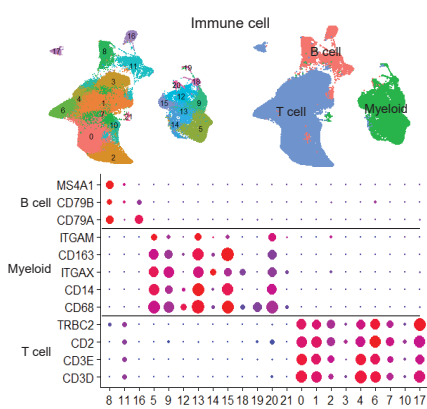

F

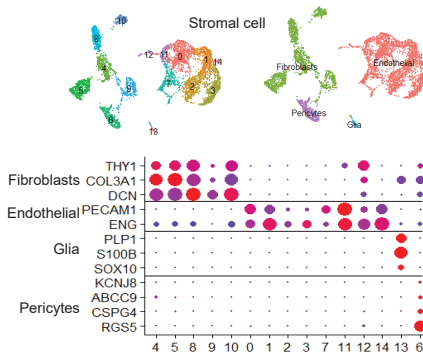

Supplement: NIHMS1956842-supplement-1.pdf [file NIHMS1956842-supplement-1.pdf]

**A** GSEA: stemness signatures (FDR <0.05)

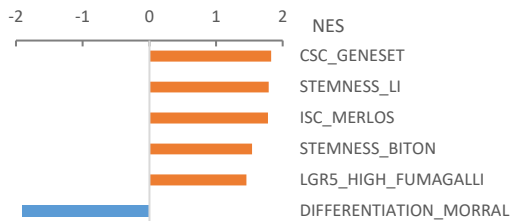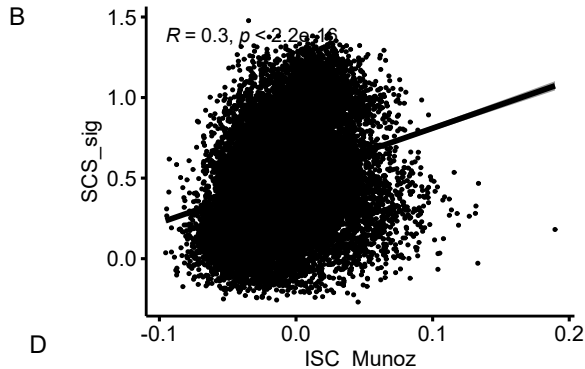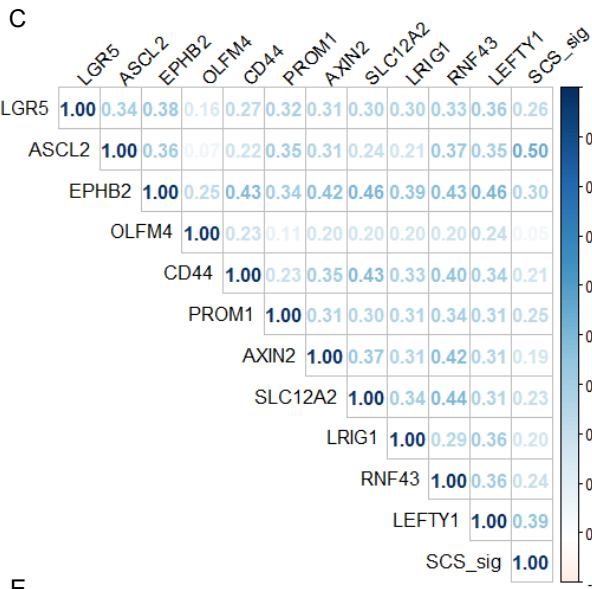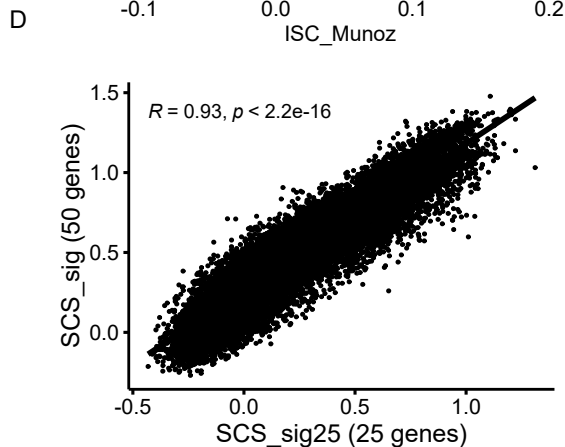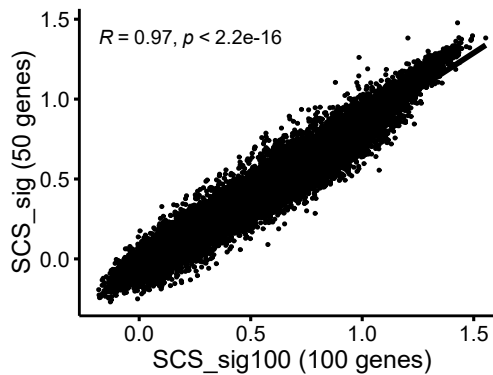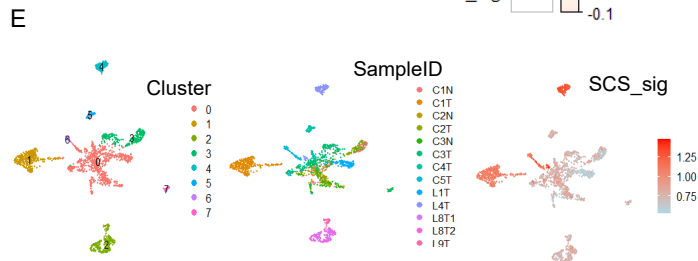

Supplement: NIHMS1956842-supplement-2.pdf [file NIHMS1956842-supplement-2.pdf]

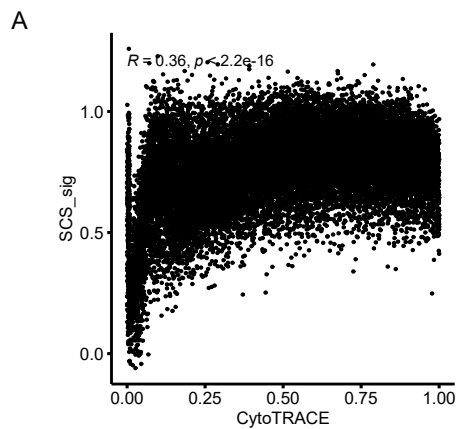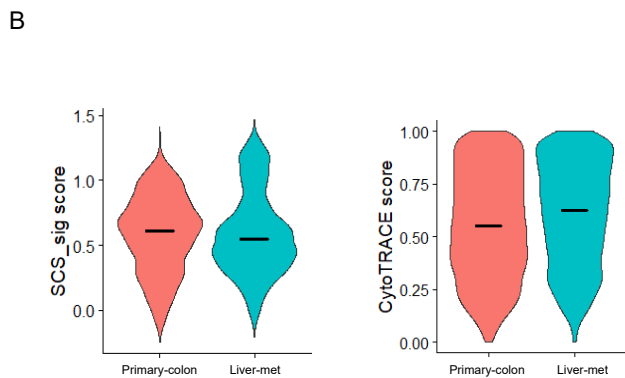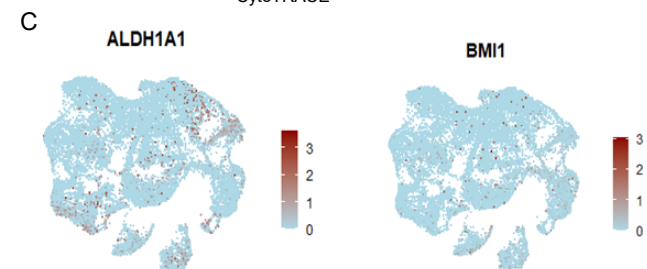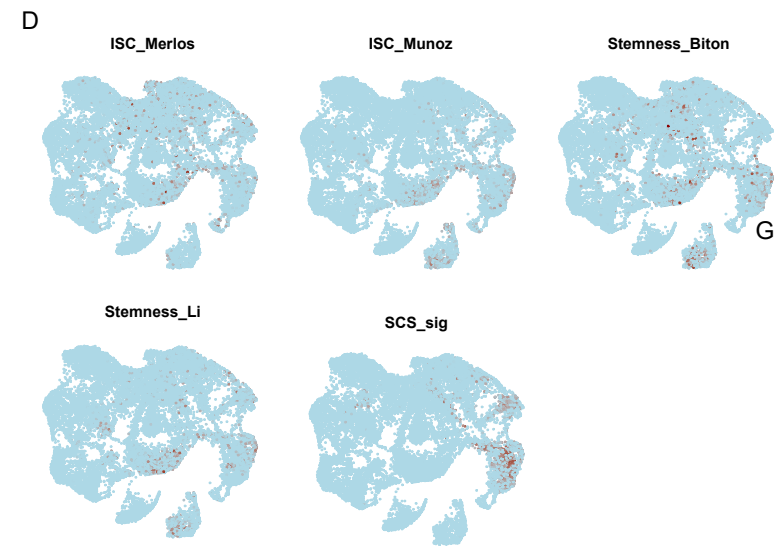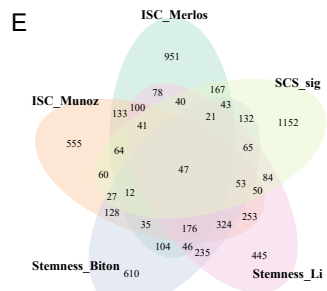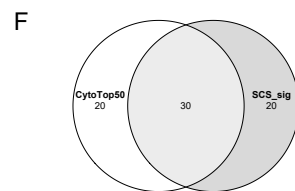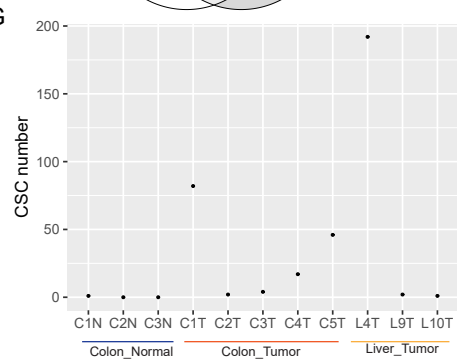

Supplement: NIHMS1956842-supplement-3.pdf [file NIHMS1956842-supplement-3.pdf]
